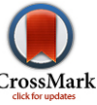

## Correction

# Correction: Evidence of a Putative Deep Sea Specific Microbiome in Marine Sponges

**The PLOS ONE Staff**

The fifth author's name is spelled incorrectly. The correct name is: Fergal O'Gara. The publisher apologizes for this error.

**Reference**

1. Kennedy J, Flemer B, Jackson SA, Morrissey JP, O'Gara F, et al. (2014) Evidence of a Putative Deep Sea Specific Microbiome in Marine Sponges. PLoS ONE 9(3): e91092. doi:10.1371/journal.pone.0091092

---

**Citation:** The PLOS ONE Staff (2014) Correction: Evidence of a Putative Deep Sea Specific Microbiome in Marine Sponges. PLoS ONE 9(7): e103400. doi:10.1371/journal.pone.0103400

**Published:** July 18, 2014

**Copyright:** © 2014 The PLOS ONE Staff. This is an open-access article distributed under the terms of the Creative Commons Attribution License, which permits unrestricted use, distribution, and reproduction in any medium, provided the original author and source are credited.
